# Supplementary material for: A New Way to Estimate Maximum Power from Wind Turbines: Linking Newtonian with Action Mechanics
Source: Copernicus journal article supplement (doi:10.5194/wes-2022-22), 2022-05-04
Supplement: Supplementary file 1 [file wes-2022-22-supplement.pdf]

---

# Supplementary Materials for

## A New Way to Estimate Maximum Power from Wind Turbines: Linking Newtonian with Action Mechanics

### Estimating maximum power from wind turbines

Ivan R. Kennedy,<sup>1,3,\*</sup> Migdat Hodzic,<sup>2</sup> Angus N. Crossan,<sup>3</sup> Nikolas Crossan,<sup>3</sup> Niranjan Acharige,<sup>1</sup> John Runcie<sup>1</sup>

Corresponding author: [ivan.kennedy@sydney.edu.au](mailto:ivan.kennedy@sydney.edu.au)

### This PDF file includes:

1. Figure S1. . Outline of computer program
2. Table S1. Data output for Vevor 1.24 m diameter turbine. Variation in wind angle of incidence.
3. Table S2. Data output for vevor 1.24 m diameter turbine. Variation in tip-speed ratio.
4. Table S3. Data sets for GE 1.5MW output turbine, variation in angle of incidence and in tip-speed ratio.
5. Turbine5/cal: Coding for TRS32 Astrocal Vevor Turbine (cgs units).  
Coding for GE scale turbines is similar except in SI units for inputs and outputs.
6. Python code for estimation of wind power
7. Mathematica notebook for simple estimation of wind power

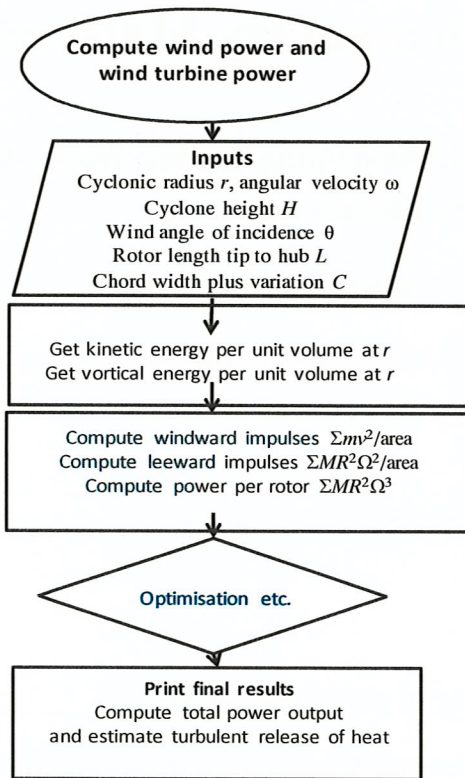

Figure S1. Outline of computer programs.

V=10 m/sec

Venor 1.24 m diameter

Area = 358.8 cm<sup>2</sup>

L=52 cm

D=1.225x10<sup>-3</sup>

R=10<sup>o</sup>8 cm

H=10<sup>o</sup>5 cm

Table S1

|                        | 5        | 10       | 15       | 20       | 25       | 30       | 35       | 40       | 45       | 50       | 55       | 60       | 65       | 70       | 75       | 80       | 85       | 90       |          |
|------------------------|----------|----------|----------|----------|----------|----------|----------|----------|----------|----------|----------|----------|----------|----------|----------|----------|----------|----------|----------|
| S=3                    |          |          |          |          |          |          |          |          |          |          |          |          |          |          |          |          |          |          |          |
| Tw x10 <sup>7</sup>    | 0.062243 | 0.244256 | 0.532217 | 0.904152 | 1.33145  | 1.780834 | 2.216664 | 2.603405 | 2.908089 | 3.102617 | 3.165724 | 3.084494 | 2.855304 | 2.48414  | 1.986262 | 1.385243 | 0.711438 | 0        | 0        |
| Tb x10 <sup>7</sup>    | 0.080049 | 0.079134 | 0.077617 | 0.075509 | 0.072826 | 0.069589 | 0.065823 | 0.061555 | 0.056819 | 0.051651 | 0.04609  | 0.040177 | 0.033959 | 0.027483 | 0.020797 | 0.013953 | 0.007003 | 0        | 0        |
| Tw-Tb x10 <sup>7</sup> | -0.01781 | 0.165122 | 0.454601 | 0.828644 | 1.258624 | 1.711245 | 2.150841 | 2.541849 | 2.85127  | 3.050966 | 3.119635 | 3.044317 | 2.821345 | 2.456657 | 1.965465 | 1.371289 | 0.704435 | 0        | 0        |
| Q                      | 57.6923  | 57.6923  | 57.69231 | 57.6923  | 57.69231 | 57.69231 | 57.69231 | 57.6923  | 57.69231 | 57.69231 | 57.69231 | 57.69231 | 57.69231 | 57.69231 | 57.69231 | 57.69231 | 57.69231 | 57.69231 | 57.69231 |
| P mW                   | -1.02728 | 9.526199 | 26.22695 | 47.80635 | 72.61294 | 98.72566 | 124.0872 | 146.6451 | 164.4963 | 176.0173 | 179.9789 | 175.6337 | 162.7699 | 141.7302 | 113.3922 | 79.11284 | 40.64047 | 0        | 0        |
| V=15                   |          |          |          |          |          |          |          |          |          |          |          |          |          |          |          |          |          |          |          |
| S=3                    |          |          |          |          |          |          |          |          |          |          |          |          |          |          |          |          |          |          |          |
| Tw x10 <sup>7</sup>    | 0.140046 | 0.549575 | 1.197489 | 2.034344 | 2.995763 | 4.006876 | 4.987494 | 5.857661 | 6.543201 | 6.980888 | 7.122879 | 6.940113 | 6.424435 | 5.589315 | 4.469089 | 3.116796 | 1.600736 | 0        | 0        |
| Tb x10 <sup>7</sup>    | 0.120074 | 0.118701 | 0.116425 | 0.113263 | 0.109239 | 0.104384 | 0.098734 | 0.092333 | 0.085229 | 0.077477 | 0.069134 | 0.060266 | 0.050939 | 0.041224 | 0.031196 | 0.02093  | 0.010505 | 0        | 0        |
| Tw-Tb x10 <sup>7</sup> | 0.019973 | 0.430874 | 1.081064 | 1.921081 | 2.885524 | 3.902492 | 4.88876  | 5.765328 | 6.457972 | 6.903411 | 7.053745 | 6.879847 | 6.373496 | 5.54809  | 4.437893 | 3.095866 | 1.590231 | 0        | 0        |
| Q                      | 86.5384  | 86.5385  | 86.5385  | 86.53846 | 86.53846 | 86.53846 | 86.53846 | 86.53846 | 86.53846 | 86.53846 | 86.53846 | 86.53846 | 86.53846 | 86.53846 | 86.53846 | 86.53846 | 86.53846 | 86.53846 | 86.53846 |
| P mW                   | 1.728414 | 37.28721 | 93.55365 | 166.2474 | 249.7953 | 337.7156 | 423.0657 | 498.9226 | 558.863  | 597.4106 | 610.4202 | 595.3713 | 551.5525 | 480.1232 | 384.0484 | 267.9115 | 137.6161 | 0        | 0        |
| V=20                   |          |          |          |          |          |          |          |          |          |          |          |          |          |          |          |          |          |          |          |
| S=3                    |          |          |          |          |          |          |          |          |          |          |          |          |          |          |          |          |          |          |          |
| Tw x10 <sup>7</sup>    | 0.248971 | 0.977023 | 2.128869 | 3.616612 | 5.325801 | 7.123335 | 8.866656 | 10.41362 | 11.63236 | 12.41047 | 12.6629  | 12.33798 | 11.42112 | 9.93656  | 7.945048 | 5.540971 | 2.845753 | 0        | 0        |
| Tb                     | 0.160098 | 0.158268 | 0.155233 | 0.151018 | 0.145652 | 0.139179 | 0.131646 | 0.123111 | 0.113639 | 0.103302 | 0.090218 | 0.080355 | 0.067919 | 0.054966 | 0.041595 | 0.027907 | 0.014007 | 0        | 0        |
| Tw-Tb                  | 0.088873 | 0.818755 | 1.973636 | 3.465595 | 5.180149 | 6.984156 | 8.735011 | 10.29051 | 11.51872 | 12.30717 | 12.57268 | 12.25762 | 11.3532  | 9.881594 | 7.903453 | 5.513064 | 2.831746 | 0        | 0        |
| Q                      | 115.3846 | 115.3846 | 115.3846 | 115.3846 | 115.3846 | 115.3846 | 115.3846 | 115.3846 | 115.3846 | 115.3846 | 115.3846 | 115.3846 | 115.3846 | 115.3846 | 115.3846 | 115.3846 | 115.3846 | 115.3846 | 115.3846 |
| P mW                   | 10.25459 | 94.47168 | 227.7272 | 399.8763 | 597.7094 | 805.8642 | 1007.886 | 1187.366 | 1329.083 | 1420.058 | 1450.694 | 1414.341 | 1309.985 | 1140.184 | 911.9369 | 636.1228 | 326.7399 | 0        | 0        |
| 10 m/s                 |          |          |          |          |          |          |          |          |          |          |          |          |          |          |          |          |          |          |          |
| 15 m/s                 |          |          |          |          |          |          |          |          |          |          |          |          |          |          |          |          |          |          |          |
| 20 m/s                 |          |          |          |          |          |          |          |          |          |          |          |          |          |          |          |          |          |          |          |

angle

|                  |                         | Table 52                |          |          |          |          |           |          |          |          |          |          |          |          |          |          |
|------------------|-------------------------|-------------------------|----------|----------|----------|----------|-----------|----------|----------|----------|----------|----------|----------|----------|----------|----------|
|                  |                         | Varying tip-speed ratio |          |          |          |          |           |          |          |          |          |          |          |          |          |          |
|                  |                         | Vewor 1.24 m diameter   |          |          |          |          |           |          |          |          |          |          |          |          |          |          |
|                  |                         | 1                       | 2        | 3        | 4        | 5        | 6         | 7        | 8        | 9        | 10       | 11       | 12       | 13       | 14       | 15       |
| 10 m/sec         | $\lambda$               | 1                       | 2        | 3        | 4        | 5        | 6         | 7        | 8        | 9        | 10       | 11       | 12       | 13       | 14       | 15       |
|                  | $T_w \times 10^7$       | 3.165724                | 3.165724 | 3.165724 | 3.165724 | 3.165724 | 3.165724  | 3.165724 | 3.165724 | 3.165724 | 3.165724 | 3.165724 | 3.165724 | 3.165724 | 3.165724 | 3.165724 |
|                  | Tb $\times 10^7$        | 0.015363                | 0.030726 | 0.04609  | 0.061453 | 0.076816 | 0.092179  | 0.107542 | 0.122906 | 0.138269 | 0.153632 | 0.168995 | 0.184358 | 0.199722 | 0.215085 | 0.230448 |
|                  | $T_w - T_b \times 10^7$ | 3.150361                | 3.134998 | 3.119635 | 3.104271 | 3.088908 | 3.073544  | 3.058182 | 3.042819 | 3.027455 | 3.012092 | 2.996729 | 2.981366 | 2.966003 | 2.950639 | 2.935276 |
| $\Omega$ rad/sec |                         | 19.23077                | 38.4615  | 57.69231 | 76.9231  | 96.15385 | 115.3846  | 134.6154 | 153.8462 | 173.0769 | 192.3076 | 211.5385 | 230.7692 | 250      | 269.2307 | 288.4615 |
| P w              |                         | 60.58386                | 120.5768 | 179.9789 | 238.7901 | 297.0104 | 354.6398  | 411.6783 | 468.1259 | 523.9827 | 579.2485 | 633.9234 | 688.0074 | 741.5006 | 794.4029 | 846.7143 |
| 15 m/sec         | $\lambda$               | 1                       | 2        | 3        | 4        | 5        | 6         | 7        | 8        | 9        | 10       | 11       | 12       | 13       | 14       | 15       |
|                  | $T_w \times 10^7$       | 7.12288                 | 7.12288  | 7.12288  | 7.12288  | 7.12288  | 7.12288   | 7.12288  | 7.12288  | 7.12288  | 7.12288  | 7.12288  | 7.12288  | 7.12288  | 7.12288  | 7.12288  |
|                  | Tb $\times 10^7$        | 0.02305                 | 0.04609  | 0.06913  | 0.09218  | 0.115223 | 0.138269  | 0.161314 | 0.184358 | 0.207403 | 0.230448 | 0.253493 | 0.276538 | 0.299582 | 0.322627 | 0.345672 |
|                  | $T_w - T_b \times 10^7$ | 7.09983                 | 7.076789 | 7.05374  | 7.0307   | 7.007655 | 6.984611  | 6.961566 | 6.938521 | 6.915476 | 6.89243  | 6.869387 | 6.846342 | 6.823297 | 6.800252 | 6.777207 |
| $\Omega$ rad/sec |                         | 29                      | 57.6923  | 86.5385  | 115.3846 | 144.2307 | 173.0769  | 201.923  | 230.7692 | 259.6153 | 288.4614 | 317.3077 | 346.1538 | 375      | 403.8462 | 432.6923 |
| P w              |                         | 204.803                 | 408.2763 | 610.4202 | 811.2346 | 1010.72  | 1208.875  | 1405.701 | 1601.197 | 1795.364 | 1988.201 | 2179.709 | 2369.888 | 2558.736 | 2746.256 | 2932.446 |
| 20 m/sec         | $\lambda$               | 1                       | 2        | 3        | 4        | 5        | 6         | 7        | 8        | 9        | 10       | 11       | 12       | 13       | 14       | 15       |
|                  | $T_w \times 10^7$       | 12.6629                 | 12.6629  | 12.6629  | 12.6629  | 12.6629  | 12.6629   | 12.6629  | 12.6629  | 12.6629  | 12.6629  | 12.6629  | 12.6629  | 12.6629  | 12.6629  | 12.6629  |
|                  | Tb $\times 10^7$        | 0.030726                | 0.061453 | 0.092179 | 0.122906 | 0.153632 | 0.184358  | 0.215085 | 0.245811 | 0.276538 | 0.307264 | 0.33799  | 0.368717 | 0.399443 | 0.43017  | 0.460896 |
|                  | $T_w - T_b \times 10^7$ | 12.63217                | 12.60144 | 12.57072 | 12.53999 | 12.50926 | 12.47854  | 12.44781 | 12.41709 | 12.38636 | 12.35563 | 12.32491 | 12.29418 | 12.26345 | 12.23273 | 12.202   |
| $\Omega$ rad/sec |                         | 38.46154                | 76.92308 | 115.3846 | 153.8462 | 192.3077 | 230.7692  | 269.2308 | 307.6923 | 346.1538 | 384.6154 | 423.0769 | 461.5385 | 500      | 538.4615 | 576.9231 |
| P w              |                         | 485.8527                | 969.3418 | 1450.467 | 1929.229 | 2405.628 | 2879.6626 | 3351.334 | 3820.642 | 4287.586 | 4752.166 | 5214.383 | 5674.237 | 6131.173 | 6586.853 | 7039.616 |

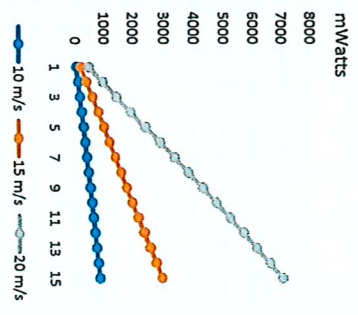



|                                                             |     |         |                                    |     |         |
|-------------------------------------------------------------|-----|---------|------------------------------------|-----|---------|
| 3647                                                        | 046 | .       | 3660                               | 046 | .       |
| 3648                                                        | 046 | .       | 3661                               | 046 | .       |
| 3649                                                        | 046 | .       | 3662                               | 046 | .       |
| 3650                                                        | 046 | .       | 3663                               | 046 | .       |
| 3651                                                        | 046 | .       | 3664                               | 046 | .       |
| 3652                                                        | 046 | .       | 3665                               | 046 | .       |
| 3653                                                        | 046 | .       | 3666                               | 046 | .       |
| 3654                                                        | 046 | .       | 3667                               | 046 | .       |
| 3655                                                        | 046 | .       | 3668                               | 046 | .       |
| 3656                                                        | 046 | .       | 3669                               | 046 | .       |
| 3657                                                        | 046 | .       | 3670                               | 046 | .       |
| 3658                                                        | 046 | .       | 3671                               | 046 | .       |
| 3659                                                        | 046 | .       |                                    |     |         |
| Turbine5/cal Vevor Turbine cgs                              |     |         | 0593                               | 119 | print   |
| KE = IW <sup>2</sup> /2 I=MR <sup>2</sup> /2 28/08/21 08/21 |     |         | 0594                               | 002 | HALT    |
| Revised 14/9/21 e <sup>0.67</sup> TbD                       |     |         | Chord width of rotor blade cm      |     |         |
| Estimate [Tw-Tb]xRadian/sec=Power                           |     |         | 0635                               | 096 | LABEL   |
| Radius of air cell say 1000 km 10 <sup>8</sup> B            |     |         | 0636                               | 067 | C       |
| Tapered blade 2.3 to 11.5 cm                                |     |         | 0637                               | 107 | STO MEM |
| Radius is R+10 cm + 1.0 cm up to 52 cm                      |     |         | 0638                               | 048 | 0       |
| Chord from 2.30 to 11.504 +0.1769/cm                        |     |         | 0639                               | 054 | 6       |
| Get KE and Vortical energy throughput                       |     |         | 0640                               | 119 | print   |
| Revised 3/10/21 mv <sup>2</sup> for kT in vort en           |     |         | 0641                               | 002 | HALT    |
| 0400                                                        | 096 | LABEL   | Angle of attack degrees            |     |         |
| 0401                                                        | 082 | R       | 0682                               | 096 | LABEL   |
| 0402                                                        | 107 | STO MEM | 0683                               | 079 | 0       |
| 0403                                                        | 048 | 0       | 0684                               | 107 | STO MEM |
| 0404                                                        | 049 | 1       | 0685                               | 048 | 0       |
| 0405                                                        | 119 | print   | 0686                               | 055 | 7       |
| 0406                                                        | 002 | HALT    | 0687                               | 119 | print   |
| Cell height H say 5000 m 5.10 <sup>5</sup> cm               |     |         | 0688                               | 002 | HALT    |
| 0447                                                        | 096 | LABEL   | Length of rotor input L cm         |     |         |
| 0448                                                        | 072 | H       | 0729                               | 096 | LABEL   |
| 0449                                                        | 107 | STO MEM | 0730                               | 076 | L       |
| 0450                                                        | 048 | 0       | 0731                               | 107 | STO MEM |
| 0451                                                        | 050 | 2       | 0732                               | 048 | 0       |
| 0452                                                        | 119 | print   | 0733                               | 056 | 8       |
| 0453                                                        | 002 | HALT    | 0734                               | 119 | print   |
| Angular velocity W radians/sec                              |     |         | 0735                               | 002 | HALT    |
| 0494                                                        | 096 | LABEL   | Tip speed/wind ratio lambda        |     |         |
| 0495                                                        | 087 | W       | 0776                               | 096 | LABEL   |
| 0496                                                        | 107 | STO MEM | 0777                               | 083 | S       |
| 0497                                                        | 048 | 0       | 0778                               | 107 | STO MEM |
| 0498                                                        | 051 | 3       | 0779                               | 048 | 0       |
| 0499                                                        | 119 | print   | 0780                               | 057 | 9       |
| 0500                                                        | 002 | HALT    | 0781                               | 119 | print   |
| Mean air density g/cm <sup>3</sup>                          |     |         | 0782                               | 002 | HALT    |
| 0541                                                        | 096 | LABEL   | 0783                               | 096 | LABEL   |
| 0542                                                        | 068 | D       | 0784                               | 088 | X       |
| 0543                                                        | 107 | STO MEM | Calculate max wind speed rw cm/sec |     |         |
| 0544                                                        | 048 | 0       | 0825                               | 040 | (       |
| 0545                                                        | 052 | 4       | 0826                               | 109 | RCL MEM |
| 0546                                                        | 119 | print   | 0827                               | 048 | 0       |
| 0547                                                        | 002 | HALT    | 0828                               | 049 | 1       |
| Area of wind blades A=LxC cm <sup>2</sup>                   |     |         | 0829                               | 042 | x       |
| 0588                                                        | 096 | LABEL   | 0830                               | 109 | RCL MEM |
| 0589                                                        | 065 | A       | 0831                               | 048 | 0       |
| 0590                                                        | 107 | STO MEM | 0832                               | 051 | 3       |
| 0591                                                        | 048 | 0       | 0833                               | 041 | )       |
| 0592                                                        | 053 | 5       | Print max wind speed cm/sec        |     |         |

```

0782 002 HALT
0783 096 LABEL
0784 088 X
Calculate max wind speed rw cm/sec
0825 040 (
0826 109 RCL MEM
0827 048 0
0828 049 1
0829 042 x
0830 109 RCL MEM
0831 048 0
0832 051 3
0833 041 )
Print max wind speed cm/sec
0874 119 print
0875 107 STO MEM
0876 049 1
0877 048 0
Calculate KE
Calculate volume cm^3
0958 040 (
0959 112 pi
0960 042 x
0961 109 RCL MEM
0962 048 0
0963 049 1
0964 113 Square
0965 042 x
0966 109 RCL MEM
0967 048 0
0968 050 2
0969 041 )
Print vol cm^3 of air cell, stow m11
1010 119 print
1011 107 STO MEM
1012 049 1
1013 049 1
1014 040 (
1015 109 RCL MEM
1016 049 1
1017 049 1
1018 042 x
1019 109 RCL MEM
1020 048 0
1021 052 4
1022 041 )
Print mass of air cell, stow m12 g
1063 119 print
1064 107 STO MEM
1065 049 1
1066 050 2
1067 040 (
1068 109 RCL MEM
1069 049 1
1070 050 2
1071 042 x
1072 109 RCL MEM
1073 048 0
1074 049 1
1075 113 Square
1076 047 /
1077 052 4
1078 041 )
Print I and stow in m13
1119 119 print
1120 107 STO MEM
1121 049 1
1122 051 3
1123 040 (
1124 109 RCL MEM
1125 049 1
1126 051 3
1127 042 x
1128 109 RCL MEM
1129 048 0
1130 051 3
1131 113 Square
1132 041 )
Print KE IW^2 of air cell, stow m14
1173 119 print
1174 107 STO MEM
1175 049 1
1176 052 4
Calculate KE, power of turbine volume
1217 040 (
1218 040 (
1219 040 (
1220 040 (
1221 109 RCL MEM
1222 049 1
1223 048 0
1224 042 x
1225 112 pi
1226 042 x
1227 109 RCL MEM
1228 048 0
1229 056 8
1230 113 Square
1231 041 )
1232 042 x
1233 040 (
1234 109 RCL MEM
1235 048 0
1236 052 4
1237 042 x
1238 109 RCL MEM
1239 049 1
1240 048 0
1241 113 Square
1242 041 )
1243 041 )
1244 047 /
1245 050 2
1246 041 )
Print rate kinetic energy P=DAv^30.6
1287 119 print
1288 042 x
1289 048 0
1290 046 .
1291 054 6

```

```

1292 041 )
Print adjustment for Cp
1333 119 print
Get vortical energy
1374 107 STO MEM
1375 049 1
1376 052 4
1377 040 (
1378 040 (
1379 040 (
1380 112 pi
1381 042 x
1382 109 RCL MEM
1383 048 0
1384 056 8
1385 113 Square
1386 041 )
1387 047 /
1388 040 (
1389 051 3
1390 042 x
1391 109 RCL MEM
1392 048 0
1393 053 5
1394 041 )
1395 041 )
1396 119 print
1397 114 1/x
1398 042 x
1399 109 RCL MEM
1400 049 1
1401 052 4
1402 041 )
1403 119 print
1404 040 (
1405 040 (
1406 040 (
1407 109 RCL MEM
1408 048 0
1409 049 1
1410 113 Square
1411 042 x
1412 109 RCL MEM
1413 048 0
1414 051 3
1415 041 )
1416 119 print
1417 042 x
1418 040 (
1419 050 2
1420 057 9
1421 042 x
1422 049 1
1423 046 .
1424 054 6
1425 055 7
1426 101 EE
1427 050 2
1428 052 4
1429 111 +/-

```

```

1430 041 )
1431 041 )
Print action @v
1472 119 print
1473 047 /
1474 049 1
1475 046 .
1476 048 0
1477 053 5
1478 052 4
1479 101 EE
1480 050 2
1481 055 7
1482 111 +/-
1483 041 )
Print nv
1524 119 print
1525 107 STO MEM
1526 056 8
1527 048 0
Get mv^2lnvv
1568 040 (
1569 040 (
1570 109 RCL MEM
1571 056 8
1572 048 0
1573 110 LOG e
1574 119 print
1575 042 x
1576 040 (
1577 040 (
1578 050 2
1579 057 9
1580 042 x
1581 049 1
1582 046 .
1583 054 6
1584 055 7
1585 101 EE
1586 050 2
1587 052 4
1588 111 +/-
1589 041 )
1590 042 x
1591 109 RCL MEM
1592 049 1
1593 048 0
1594 113 Square
1595 041 )
1596 107 STO MEM
1597 057 9
1598 049 1
Print mv^2
1639 119 print
1640 041 )
Print mv^2lnnv
1681 119 print
1682 041 )
1683 107 STO MEM
1684 056 8

```



|                            |     |         |  |                                       |     |         |
|----------------------------|-----|---------|--|---------------------------------------|-----|---------|
| 1685                       | 049 | 1       |  | 1862                                  | 050 | 2       |
| 1686                       | 040 | (       |  | 1863                                  | 052 | 4       |
| 1687                       | 109 | RCL MEM |  | 1864                                  | 111 | +/-     |
| 1688                       | 056 | 8       |  | 1865                                  | 041 | )       |
| 1689                       | 049 | 1       |  | 1866                                  | 041 | )       |
| 1690                       | 047 | /       |  | Print N per cm^3                      |     |         |
| 1691                       | 109 | RCL MEM |  | 1907                                  | 119 | print   |
| 1692                       | 056 | 8       |  | 1908                                  | 042 | x       |
| 1693                       | 048 | 0       |  | 1909                                  | 109 | RCL MEM |
| 1694                       | 041 | )       |  | 1910                                  | 056 | 8       |
| Print hvv vortical quantum |     |         |  | 1911                                  | 049 | 1       |
| 1735                       | 119 | print   |  | 1912                                  | 041 | )       |
| 1736                       | 047 | /       |  | 1913                                  | 119 | print   |
| 1737                       | 054 | 6       |  | Print ergs/cm^3 or vortical pressure  |     |         |
| 1738                       | 046 | .       |  | 1954                                  | 107 | STO MEM |
| 1739                       | 054 | 6       |  | 1955                                  | 056 | 8       |
| 1740                       | 050 | 2       |  | 1956                                  | 049 | 1       |
| 1741                       | 054 | 6       |  | 1957                                  | 040 | (       |
| 1742                       | 049 | 1       |  | 1958                                  | 109 | RCL MEM |
| 1743                       | 101 | EE      |  | 1959                                  | 056 | 8       |
| 1744                       | 050 | 2       |  | 1960                                  | 049 | 1       |
| 1745                       | 055 | 7       |  | 1961                                  | 042 | x       |
| 1746                       | 111 | +/-     |  | 1962                                  | 109 | RCL MEM |
| 1747                       | 041 | )       |  | 1963                                  | 049 | 1       |
| Print v frequency          |     |         |  | 1964                                  | 048 | 0       |
| 1788                       | 119 | print   |  | 1965                                  | 041 | )       |
| 1789                       | 114 | 1/x     |  | Print power pe/cm^2                   |     |         |
| 1790                       | 042 | x       |  | 2006                                  | 119 | print   |
| 1791                       | 050 | 2       |  | 2007                                  | 107 | STO MEM |
| 1792                       | 046 | .       |  | 2008                                  | 056 | 8       |
| 1793                       | 057 | 9       |  | 2009                                  | 050 | 2       |
| 1794                       | 057 | 9       |  | Get power for 3 blades and area       |     |         |
| 1795                       | 055 | 7       |  | 2050                                  | 040 | (       |
| 1796                       | 057 | 9       |  | 2051                                  | 109 | RCL MEM |
| 1797                       | 101 | EE      |  | 2052                                  | 056 | 8       |
| 1798                       | 049 | 1       |  | 2053                                  | 050 | 2       |
| 1799                       | 048 | 0       |  | 2054                                  | 042 | x       |
| 1800                       | 041 | )       |  | 2055                                  | 109 | RCL MEM |
| Print Y wavelength         |     |         |  | 2056                                  | 048 | 0       |
| 1841                       | 119 | print   |  | 2057                                  | 053 | 5       |
| 1842                       | 040 | (       |  | 2058                                  | 042 | x       |
| 1843                       | 040 | (       |  | 2059                                  | 051 | 3       |
| 1844                       | 049 | 1       |  | 2060                                  | 041 | )       |
| 1845                       | 046 | .       |  | Print vortical power total blade area |     |         |
| 1846                       | 050 | 2       |  | 2101                                  | 119 | print   |
| 1847                       | 050 | 2       |  | 2102                                  | 107 | STO MEM |
| 1848                       | 053 | 5       |  | 2103                                  | 056 | 8       |
| 1849                       | 101 | EE      |  | 2104                                  | 051 | 3       |
| 1850                       | 051 | 3       |  | Get T                                 |     |         |
| 1851                       | 111 | +/-     |  | 2145                                  | 040 | (       |
| 1852                       | 047 | /       |  | 2146                                  | 109 | RCL MEM |
| 1853                       | 040 | (       |  | 2147                                  | 057 | 9       |
| 1854                       | 050 | 2       |  | 2148                                  | 049 | 1       |
| 1855                       | 057 | 9       |  | 2149                                  | 047 | /       |
| 1856                       | 042 | x       |  | 2150                                  | 040 | (       |
| 1857                       | 049 | 1       |  | 2151                                  | 049 | 1       |
| 1858                       | 046 | .       |  | 2152                                  | 046 | .       |
| 1859                       | 054 | 6       |  | 2153                                  | 051 | 3       |
| 1860                       | 055 | 7       |  | 2154                                  | 056 | 8       |
| 1861                       | 101 | EE      |  | 2155                                  | 048 | 0       |

|                                          |     |         |                                        |     |         |
|------------------------------------------|-----|---------|----------------------------------------|-----|---------|
| 2156                                     | 054 | 6       | 2411                                   | 109 | RCL MEM |
| 2157                                     | 101 | EE      | 2412                                   | 048 | 0       |
| 2158                                     | 049 | 1       | 2413                                   | 052 | 4       |
| 2159                                     | 054 | 6       | 2414                                   | 042 | x       |
| 2160                                     | 111 | +/-     | 2415                                   | 109 | RCL MEM |
| 2161                                     | 042 | x       | 2416                                   | 049 | 1       |
| 2162                                     | 051 | 3       | 2417                                   | 048 | 0       |
| 2163                                     | 041 | )       | 2418                                   | 041 | )       |
| 2164                                     | 041 | )       | Print, stow total impact SumMvsin0/sec |     |         |
| Print Torque/Temperature                 |     |         | 2459                                   | 119 | print   |
| 2205                                     | 119 | print   | 2460                                   | 107 | STD MEM |
| Get thrust per rotor blade @ 0 degrees   |     |         | 2461                                   | 049 | 1       |
| 2246                                     | 040 | (       | 2462                                   | 055 | 7       |
| 2247                                     | 109 | RCL MEM | Calculate Torque and anti-Torque-heat  |     |         |
| 2248                                     | 048 | 0       | 2503                                   | 040 | (       |
| 2249                                     | 053 | 5       | 2504                                   | 040 | (       |
| 2250                                     | 042 | x       | 2505                                   | 109 | RCL MEM |
| 2251                                     | 040 | (       | 2506                                   | 049 | 1       |
| 2252                                     | 109 | RCL MEM | 2507                                   | 055 | 7       |
| 2253                                     | 048 | 0       | 2508                                   | 047 | /       |
| 2254                                     | 055 | 7       | 2509                                   | 109 | RCL MEM |
| 2255                                     | 115 | Sine    | 2510                                   | 048 | 0       |
| 2256                                     | 041 | )       | 2511                                   | 053 | 5       |
| 2257                                     | 042 | x       | 2512                                   | 041 | )       |
| 2258                                     | 109 | RCL MEM | 2513                                   | 107 | STD MEM |
| 2259                                     | 049 | 1       | 2514                                   | 049 | 1       |
| 2260                                     | 048 | 0       | 2515                                   | 055 | 7       |
| 2261                                     | 041 | )       | 2516                                   | 041 | )       |
| Print A sin 0 x v = volume per sec       |     |         | 2517                                   | 119 | print   |
| 2302                                     | 119 | print   | 2518                                   | 107 | STD MEM |
| 2303                                     | 107 | STD MEM | 2519                                   | 049 | 1       |
| 2304                                     | 049 | 1       | 2520                                   | 055 | 7       |
| 2305                                     | 053 | 5       | 2521                                   | 040 | (       |
| 2306                                     | 040 | (       | 2522                                   | 050 | 2       |
| 2307                                     | 109 | RCL MEM | 2523                                   | 046 | .       |
| 2308                                     | 049 | 1       | 2524                                   | 051 | 3       |
| 2309                                     | 053 | 5       | 2525                                   | 048 | 0       |
| 2310                                     | 042 | x       | Print tip chord                        |     |         |
| 2311                                     | 109 | RCL MEM | 2566                                   | 119 | print   |
| 2312                                     | 048 | 0       | 2567                                   | 107 | STD MEM |
| 2313                                     | 052 | 4       | 2568                                   | 048 | 0       |
| 2314                                     | 042 | x       | 2569                                   | 054 | 6       |
| 2315                                     | 109 | RCL MEM | Print tip width                        |     |         |
| 2316                                     | 049 | 1       | 2610                                   | 119 | print   |
| 2317                                     | 048 | 0       | 2611                                   | 109 | RCL MEM |
| 2318                                     | 113 | Square  | 2612                                   | 048 | 0       |
| 2319                                     | 047 | /       | 2613                                   | 056 | 8       |
| 2320                                     | 050 | 2       | 2614                                   | 107 | STD MEM |
| 2321                                     | 041 | )       | 2615                                   | 048 | 0       |
| Print M A sin 0 v^2/2 KE impact on blade |     |         | 2616                                   | 048 | 0       |
| 2362                                     | 119 | print   | 2617                                   | 119 | print   |
| 2363                                     | 107 | STD MEM | Get Tw and Tb                          |     |         |
| 2364                                     | 049 | 1       | 2658                                   | 096 | LABEL   |
| 2365                                     | 054 | 6       | 2659                                   | 084 | T       |
| Calculate SumMvsin0/sec force/blade      |     |         | 2660                                   | 040 | (       |
| 2406                                     | 040 | (       | 2661                                   | 040 | (       |
| 2407                                     | 109 | RCL MEM | 2662                                   | 048 | 0       |
| 2408                                     | 049 | 1       | 2663                                   | 046 | .       |
| 2409                                     | 053 | 5       | 2664                                   | 049 | 1       |
| 2410                                     | 042 | x       | 2665                                   | 055 | 7       |

|                                        |     |         |  |                                       |     |         |  |
|----------------------------------------|-----|---------|--|---------------------------------------|-----|---------|--|
| 2666                                   | 054 | 6       |  | 2921                                  | 057 | 9       |  |
| 2667                                   | 057 | 9       |  | Get integrated torque or rate action  |     |         |  |
| 2668                                   | 117 | SUM MEM |  | SumMvsinDcos20/metre sec;SumFxR=Tb    |     |         |  |
| 2669                                   | 048 | 0       |  | Get rotor reverse torque, action rate |     |         |  |
| 2670                                   | 054 | 6       |  | 3042                                  | 040 | (       |  |
| 2671                                   | 041 | )       |  | 3043                                  | 040 | (       |  |
| 2672                                   | 040 | (       |  | 3044                                  | 109 | RCL MEM |  |
| 2673                                   | 109 | RCL MEM |  | 3045                                  | 049 | 1       |  |
| 2674                                   | 049 | 1       |  | 3046                                  | 048 | 0       |  |
| 2675                                   | 055 | 7       |  | 3047                                  | 042 | x       |  |
| 2676                                   | 042 | x       |  | 3048                                  | 109 | RCL MEM |  |
| 2677                                   | 109 | RCL MEM |  | 3049                                  | 048 | 0       |  |
| 2678                                   | 048 | 0       |  | 3050                                  | 057 | 9       |  |
| 2679                                   | 054 | 6       |  | 3051                                  | 041 | )       |  |
| 2680                                   | 041 | )       |  | 3052                                  | 047 | /       |  |
| 2681                                   | 041 | )       |  | 3053                                  | 109 | RCL MEM |  |
| Print MvsinD/sec force/metre blade     |     |         |  | 3054                                  | 048 | 0       |  |
| 2722                                   | 107 | STO MEM |  | 3055                                  | 056 | 8       |  |
| 2723                                   | 049 | 1       |  | 3056                                  | 041 | )       |  |
| 2724                                   | 056 | 8       |  | Stow rotor W                          |     |         |  |
| 2725                                   | 040 | (       |  | 3097                                  | 107 | STO MEM |  |
| 2726                                   | 040 | (       |  | 3098                                  | 050 | 2       |  |
| 2727                                   | 050 | 2       |  | 3099                                  | 048 | 0       |  |
| 2728                                   | 042 | x       |  | 3100                                  | 040 | (       |  |
| 2729                                   | 109 | RCL MEM |  | 3101                                  | 109 | RCL MEM |  |
| 2730                                   | 048 | 0       |  | 3102                                  | 050 | 2       |  |
| 2731                                   | 055 | 7       |  | 3103                                  | 048 | 0       |  |
| 2732                                   | 041 | )       |  | 3104                                  | 042 | x       |  |
| 2733                                   | 115 | Sine    |  | 3105                                  | 040 | (       |  |
| 2734                                   | 042 | x       |  | 3106                                  | 109 | RCL MEM |  |
| 2735                                   | 109 | RCL MEM |  | 3107                                  | 048 | 0       |  |
| 2736                                   | 049 | 1       |  | 3108                                  | 048 | 0       |  |
| 2737                                   | 056 | 8       |  | 3109                                  | 043 | +       |  |
| 2738                                   | 041 | )       |  | 3110                                  | 049 | 1       |  |
| SMvsinDcos20/metresec, action/area/sec |     |         |  | 3111                                  | 048 | 0       |  |
| 2779                                   | 107 | STO MEM |  | 3112                                  | 041 | )       |  |
| 2780                                   | 049 | 1       |  | 3113                                  | 041 | )       |  |
| 2781                                   | 056 | 8       |  | Get RW of blade at R and stow         |     |         |  |
| Label Torque or rate of Action         |     |         |  | 3154                                  | 113 | Square  |  |
| Get SumRotor Windward Torque Tw        |     |         |  | 3155                                  | 041 | )       |  |
| 2862                                   | 040 | (       |  | RVdD/sec                              |     |         |  |
| 2863                                   | 109 | RCL MEM |  | 3196                                  | 107 | STO MEM |  |
| 2864                                   | 049 | 1       |  | 3197                                  | 051 | 3       |  |
| 2865                                   | 056 | 8       |  | 3198                                  | 048 | 0       |  |
| 2866                                   | 042 | x       |  | 3199                                  | 040 | (       |  |
| 2867                                   | 040 | (       |  | 3200                                  | 040 | (       |  |
| 2868                                   | 109 | RCL MEM |  | 3201                                  | 040 | (       |  |
| 2869                                   | 048 | 0       |  | Get blade area dRcost segment at R    |     |         |  |
| 2870                                   | 048 | 0       |  | 3242                                  | 109 | RCL MEM |  |
| 2871                                   | 043 | +       |  | 3243                                  | 048 | 0       |  |
| 2872                                   | 049 | 1       |  | 3244                                  | 055 | 7       |  |
| 2873                                   | 048 | 0       |  | 3245                                  | 099 | Cosine  |  |
| 2874                                   | 041 | )       |  | 3246                                  | 042 | x       |  |
| 2875                                   | 042 | x       |  | 3247                                  | 109 | RCL MEM |  |
| 2876                                   | 051 | 3       |  | 3248                                  | 048 | 0       |  |
| 2877                                   | 041 | )       |  | 3249                                  | 054 | 6       |  |
| 2878                                   | 041 | )       |  | 3250                                  | 041 | )       |  |
| Get cumulative Tw                      |     |         |  | 3251                                  | 042 | x       |  |
| 2919                                   | 117 | SUM MEM |  | Get inertia MR/sec, power MR^20m^2    |     |         |  |
| 2920                                   | 049 | 1       |  | Use 2-D density D^2/3 for Tw output   |     |         |  |

|       |                                                      |          |       |                                |         |
|-------|------------------------------------------------------|----------|-------|--------------------------------|---------|
| 3332  | 040                                                  | (        | 3548  | 051                            | 3       |
| 3333  | 109                                                  | RCL MEM  | 3549  | 109                            | RCL MEM |
| 3334  | 048                                                  | 0        | 3550  | 048                            | 0       |
| 3335  | 052                                                  | 4        | 3551  | 054                            | 6       |
| 3336  | 091                                                  | Exponent | 3552  | 119                            | print   |
| 3337  | 048                                                  | 0        | Clear | cumulative memories for reruns |         |
| 3338  | 046                                                  | .        | 3593  | 048                            | 0       |
| 3339  | 054                                                  | 6        | 3594  | 107                            | STO MEM |
| 3340  | 055                                                  | 7        | 3595  | 048                            | 0       |
| 3341  | 042                                                  | x        | 3596  | 054                            | 6       |
| 3342  | 109                                                  | RCL MEM  | 3597  | 107                            | STO MEM |
| 3343  | 051                                                  | 3        | 3598  | 049                            | 1       |
| 3344  | 048                                                  | 0        | 3599  | 057                            | 9       |
| 3345  | 041                                                  | )        | 3600  | 107                            | STO MEM |
| 3346  | 041                                                  | )        | 3601  | 050                            | 2       |
| 3347  | 047                                                  | /        | 3602  | 049                            | 1       |
| 3348  | 109                                                  | RCL MEM  | 3603  | 107                            | STO MEM |
| 3349  | 050                                                  | 2        | 3604  | 050                            | 2       |
| 3350  | 048                                                  | 0        | 3605  | 050                            | 2       |
| 3351  | 041                                                  | )        | 3606  | 002                            | HALT    |
| 3352  | 042                                                  | x        | 3607  | 046                            | .       |
| 3353  | 051                                                  | 3        | 3608  | 046                            | .       |
| 3354  | 041                                                  | )        | 3609  | 046                            | .       |
| Get   | Sum $MV^2 \cos \theta = MRVd\theta/dt = MV^2 = HEAT$ |          | 3610  | 046                            | .       |
| 3395  | 117                                                  | SUM MEM  | 3611  | 046                            | .       |
| 3396  | 050                                                  | 2        | 3612  | 046                            | .       |
| 3397  | 049                                                  | 1        | 3613  | 046                            | .       |
| Print | total back torque, action/sec                        |          | 3614  | 046                            | .       |
| 3438  | 039                                                  | Dec JPNZ | 3615  | 046                            | .       |
| 3439  | 084                                                  | T        | 3616  | 046                            | .       |
| 3440  | 040                                                  | (        | 3617  | 046                            | .       |
| 3441  | 109                                                  | RCL MEM  | 3618  | 046                            | .       |
| 3442  | 049                                                  | 1        | 3619  | 046                            | .       |
| 3443  | 057                                                  | 9        | 3620  | 046                            | .       |
| 3444  | 119                                                  | print    | 3621  | 046                            | .       |
| 3445  | 045                                                  | -        | 3622  | 046                            | .       |
| 3446  | 109                                                  | RCL MEM  | 3623  | 046                            | .       |
| 3447  | 050                                                  | 2        | 3624  | 046                            | .       |
| 3448  | 049                                                  | 1        | 3625  | 046                            | .       |
| 3449  | 119                                                  | print    | 3626  | 046                            | .       |
| 3450  | 041                                                  | )        | 3627  | 046                            | .       |
| Print | and stow 3-rotor net Torque                          |          | 3628  | 046                            | .       |
| 3491  | 119                                                  | print    | 3629  | 046                            | .       |
| 3492  | 107                                                  | STO MEM  | 3630  | 046                            | .       |
| 3493  | 050                                                  | 2        | 3631  | 046                            | .       |
| 3494  | 050                                                  | 2        | 3632  | 046                            | .       |
| 3495  | 040                                                  | (        | 3633  | 046                            | .       |
| 3496  | 109                                                  | RCL MEM  | 3634  | 046                            | .       |
| 3497  | 050                                                  | 2        | 3635  | 046                            | .       |
| 3498  | 050                                                  | 2        | 3636  | 046                            | .       |
| 3499  | 042                                                  | x        | 3637  | 046                            | .       |
| 3500  | 109                                                  | RCL MEM  | 3638  | 046                            | .       |
| 3501  | 050                                                  | 2        | 3639  | 046                            | .       |
| 3502  | 048                                                  | 0        | 3640  | 046                            | .       |
| 3503  | 119                                                  | print    | 3641  | 046                            | .       |
| 3504  | 041                                                  | )        | 3642  | 046                            | .       |
| Print | and stow net Power per windmill                      |          | 3643  | 046                            | .       |
| 3545  | 119                                                  | print    | 3644  | 046                            | .       |
| 3546  | 107                                                  | STO MEM  | 3645  | 046                            | .       |
| 3547  | 050                                                  | 2        | 3646  | 046                            | .       |

## Python coding

```
{
  "cells": [
    {
      "cell_type": "code",
      "execution_count": null,
      "metadata": {},
      "outputs": [],
      "source": [
        "from IPython.core.display import display, HTML\n",
        "display(HTML(\"<style>.container { width:98% !important;\n",
        }</style>\"))"
      ]
    },
    {
      "cell_type": "code",
      "execution_count": null,
      "metadata": {},
      "outputs": [],
      "source": [
        "import numpy as np\n",
        "import scipy"
      ]
    },
    {
      "cell_type": "code",
      "execution_count": null,
      "metadata": {},
      "outputs": [],
      "source": [
        "%matplotlib inline\n",
        "import matplotlib\n",
        "\n",
        "import matplotlib.pyplot as plt\n",
        "from matplotlib import cm\n",
        "import seaborn as sns\n",
        "matplotlib.rcParams['figure.figsize'] = (8, 8)"
      ]
    },
    {
      "cell_type": "markdown",
      "metadata": {},
      "source": [
        "---\n",
        "## Some Functional Background"
      ]
    }
  ],
}
```

```

{
  "cell_type": "markdown",
  "metadata": {},
  "source": [
    "### Anonymous Functions/Lambdas"
  ]
},
{
  "cell_type": "markdown",
  "metadata": {},
  "source": [
    "In python, the keyword `lambda` creates an \"anonymous function\".
    This is a function (a subroutine) that doesn't have a name, but can be
    executed like any other function. Since it doesn't have a name, the only
    way to keep track of it is to assign it to a variable.\n",
    "\n",
    "Historically this comes from the lambda-calculus (Alonso Church in
    the 1930s), and it is fascinating and very expressive. Unfortunately, it
    isn't used as a fundamental design unit for code in many languages...\n",
    "\n",
    "Mathematica is an exception: it uses these so extensively that they
    have quite a compact shorthand (&, #1, #2, ...): \n",
    "```\nlambda x, y, z: x + y * z```\n in python can be written as
    ``\n#1+#2*#3&``\n, where `#1` corresponds to `x`, `#2` to `y`, etc.\n",
    "\n",
    "These lambdas are functions in the sense meant by mathematicians.
    They calculate an output from only the arguments: \n",
    "$f(x, y, z) = x + y z$ \n",
    "is written as..."
  ]
},
{
  "cell_type": "code",
  "execution_count": null,
  "metadata": {},
  "outputs": [],
  "source": [
    "f = lambda x, y, z: x + y * z\n",
    "f(2, 3, 4)"
  ]
},
{
  "cell_type": "markdown",
  "metadata": {},
  "source": [
    "Using a lambda to pass an integrand to an integration algo: \n",
    "$$\int_1^3 x^2 dx = \left[\frac{x^3}{3}\right]_1^3 = \frac{26}{3}$$"
  ]
}
]

```

```
},
{
  "cell_type": "code",
  "execution_count": null,
  "metadata": {},
  "outputs": [],
  "source": [
    "sq = lambda x: np.power(x, 2)\n",
    "scipy.integrate.quad(sq, 1, 3)"
  ]
},
{
  "cell_type": "markdown",
  "metadata": {},
  "source": [
    "An important feature of anonymous functions in python is that they  
can capture values from where they are defined."
  ]
},
{
  "cell_type": "code",
  "execution_count": null,
  "metadata": {},
  "outputs": [],
  "source": [
    "three = 3\n",
    "three_plus = lambda x: three + x\n",
    "three_plus(4)"
  ]
},
{
  "cell_type": "markdown",
  "metadata": {},
  "source": [
    "It is considered very poor form to modify a captured value.\n",
    "Modifying captured values changes the meaning of an anonymous  
function without redefining it, which makes code very difficult to read  
and manage. Lots of lanugages prohibit this:"
  ]
},
{
  "cell_type": "code",
  "execution_count": null,
  "metadata": {},
  "outputs": [],
  "source": [
    "three = 5\n",
    "three_plus(4)"
  ]
}
```

```

},
{
  "cell_type": "markdown",
  "metadata": {},
  "source": [
    "### Vectorising\n",
    "This example shows the `numpy.vectorize` function, which transforms
one function to another function... It takes a scalar function as an
argument and produces another function that does the same operation over
a vector/array, elementwise:"
  ]
},
{
  "cell_type": "code",
  "execution_count": null,
  "metadata": {},
  "outputs": [],
  "source": [
    "sq_vec = np.vectorize(sq)\n",
    "sq_vec(np.array([1, 2, 3, 4, 1.414214]))"
  ]
},
{
  "cell_type": "markdown",
  "metadata": {},
  "source": [
    "The `numpy.vectorize` function actually does this to all the
arguments in a function, so that they behave according to the conventions
of numpy arrays (there is a lot of detail about all that). I use this
feature when I create the grid-based results for the 3D plot later on."
  ]
},
{
  "cell_type": "code",
  "execution_count": null,
  "metadata": {},
  "outputs": [],
  "source": [
    "f_vec = np.vectorize(f) # the function f from above: f(x, y, z) = x
+ y * z\n",
    "f_vec(x = np.array([1, 2, 3]),\n",
    "      y = np.array([4, 5, 6]),\n",
    "      z = np.array([7, 8, 9]))"
  ]
},
{
  "cell_type": "markdown",
  "metadata": {},
  "source": [

```



```

    "---\n",
    "# The Equations\n",
    "The integrand functions take numerical values in all arguments.\n",
    "\n",
    "The torque functions require `c_fn` and `theta_fn` as inputs. These
functions calculate the chord width and the angle of incidence at a given
radius.\n",
    "\n",
    "For example, this `c_fn` defines a constant chord width of 1.3m (the
radius argument is unused): \n",
    "```lambda r: 1.3```\n",
    "\n",
    "And this `theta_fn` defines the angle of incidence on a twisted
blade that goes from `theta0` at the base, to `theta0` plus 10 degrees at
the 8m tip: \n",
    "```lambda theta0, r: theta0 + 10 * deg_to_rad * r / 8.0```\n"
]
},
{
"cell_type": "markdown",
"metadata": {},
"source": [
"### Constants"
]
},
{
"cell_type": "code",
"execution_count": null,
"metadata": {},
"outputs": [],
"source": [
"deg_to_rad = 2.0 * np.pi / 360.0\n",
"rad_to_deg = 360.0 / (2 * np.pi)\n",
"radsec_to_revmin = 60/(2*np.pi)\n",
"\n",
"rho = 1.225"
]
},
{
"cell_type": "markdown",
"metadata": {},
"source": [
"### Integrals"
]
},
{
"cell_type": "code",
"execution_count": null,
"metadata": {},

```

```

"outputs": [],
"source": [
  "def tw_integrand(r, v, c, theta):\n",
  "    return (rho\n",
  "            * c\n",
  "            * np.sin(theta)\n",
  "            * np.sin(2*theta)\n",
  "            * np.power(v, 2)\n",
  "            * r)\n",
  "\n",
  "def tb_integrand(r, omega, c, theta):\n",
  "    return (np.power(rho, 2/3)\n",
  "            * c\n",
  "            * np.cos(theta)\n",
  "            * np.power(r, 2)\n",
  "            * omega)\n",
  "\n",
  "def torque_windward(v, c_fn, theta_fn, R0, RL, theta0):\n",
  "    integrand = lambda r: tw_integrand(r, v, c_fn(r),\n",
theta_fn(theta0, r))\n",
  "    res, _ = scipy.integrate.quad(integrand, R0, RL)\n",
  "    return res\n",
  "\n",
  "def torque_backward(omega, c_fn, theta_fn, R0, RL, theta0):\n",
  "    integrand = lambda r: tb_integrand(r, omega, c_fn(r),\n",
theta_fn(theta0, r))\n",
  "    res, _ = scipy.integrate.quad(integrand, R0, RL)\n",
  "    return res"
  ]
},
{
  "cell_type": "markdown",
  "metadata": {},
  "source": [
    "### Power"
  ]
},
{
  "cell_type": "code",
  "execution_count": null,
  "metadata": {},
  "outputs": [],
  "source": [
    "def power(v, omega, c_fn, theta_fn, R0, RL, theta0):\n",
    "    tw = torque_windward(v, c_fn, theta_fn, R0, RL, theta0)\n",
    "    tb = torque_backward(omega, c_fn, theta_fn, R0, RL, theta0)\n",
    "    return (tw - tb) * omega\n",
    "\n",
    "def maximise_power(v, omega, c_fn, theta_fn, R0, RL):\n",

```

```

    "    ''' Maximises power output over theta0.\n",
    "    \n",
    "    Returns the maximum power output of the blade and the theta
that produces it\n",
    "    '''\n",
    "    # scipy implements only minimisation\n",
    "    # the max of a function's values occurs at the min of the
negative of the function's values\n",
    "    def minimisation_objective(theta0):\n",
    "        return -power(v, omega, c_fn, theta_fn, R0, RL, theta0)\n",
    "    res = scipy.optimize.minimize_scalar(minimisation_objective)\n",
    "    max_power = -res.fun # negate the minimum to recover the maximum
value\n",
    "    max_theta = res.x\n",
    "    return max_power, max_theta"
]
},
{
"cell_type": "markdown",
"metadata": {},
"source": [
"---\n",
"# The Blades"
]
},
{
"cell_type": "code",
"execution_count": null,
"metadata": {},
"outputs": [],
"source": [
"# Rectangular blade definition\n",
"L = 38.75\n",
"r0 = 0.00\n",
"rL = L\n",
"c_fn = lambda r: 1.0\n",
"theta_fn = lambda theta0, r: theta0"
]
},
{
"cell_type": "raw",
"metadata": {},
"source": [
"# Vevor blade definition\n",
"# \ "Tapering from 2.30cm at the tip 62.0cm from the hub to 11.50cm
at the base,\n",
"# supported on a 10cm stalk to the hub"\n",
"\n",
"L = 0.620\n",

```

```

    "r0 = 0.100\n",
    "rL = L\n",
    "c0 = 0.115\n",
    "cL = 0.023\n",
    "\n",
    "c_fn = lambda r: (r - r0) * (cL - c0) / (rL - r0) + c0\n",
    "theta_fn = lambda theta0, r: theta0"
  ]
},
{
  "cell_type": "raw",
  "metadata": {},
  "source": [
    "# GE tapered blade definition\n",
    "L = 38.750\n",
    "r0 = 0.000\n",
    "rL = L\n",
    "c0 = 3.025\n",
    "cL = 0.100\n",
    "\n",
    "c_fn = lambda r: r * (cL - c0) / L + c0\n",
    "theta_fn = lambda theta0, r: theta0"
  ]
},
{
  "cell_type": "raw",
  "metadata": {},
  "source": [
    "# GE twisted blade definition\n",
    "L = 38.750\n",
    "r0 = 0.000\n",
    "rL = L\n",
    "c0 = 3.025\n",
    "cL = 0.100\n",
    "phiL = 15 * deg_to_rad # The twist at the tip of the blade, relative
to the base\n",
    "\n",
    "c_fn = lambda r: r * (cL - c0) / L + c0\n",
    "theta_fn = lambda theta0, r: theta0 + phiL * r / L"
  ]
},
{
  "cell_type": "markdown",
  "metadata": {},
  "source": [
    "---\n",
    "# The Plots"
  ]
}
},

```

```

{
  "cell_type": "markdown",
  "metadata": {},
  "source": [
    "### Produce a line plot similar to the paper\n",
    "Show power, windward and backward torque. Show the maximum power configuration"
  ]
},
{
  "cell_type": "code",
  "execution_count": null,
  "metadata": {},
  "outputs": [],
  "source": [
    "# turbine configuration\n",
    "λ = 8.0\n",
    "v = 15.0\n",
    "Ω = v*λ/L\n",
    "display(f'Ω = {Ω} rad/s')\n",
    "display(f'Ω = {Ω*radsec_to_revmin} rev/min')\n",
    "\n",
    "# varying the angle of incidence\n",
    "N = 80\n",
    "θ = np.linspace(5, 90, N) * deg_to_rad\n",
    "\n",
    "power_vec = np.vectorize(power)\n",
    "torque_windward_vec = np.vectorize(torque_windward)\n",
    "torque_backward_vec = np.vectorize(torque_backward)\n",
    "\n",
    "p = power_vec(v, Ω, c_fn, theta_fn, r0, rL, theta0=θ) # using an array in the theta0 argument, so that the function produces an array result\n",
    "tw = torque_windward_vec(v, c_fn, theta_fn, r0, rL, theta0=θ)\n",
    "tb = torque_backward_vec(Ω, c_fn, theta_fn, r0, rL, theta0=θ)\n",
    "\n",
    "max_p, θ_max_p = maximise_power(v, Ω, c_fn, theta_fn, r0, rL)"
  ]
},
{
  "cell_type": "code",
  "execution_count": null,
  "metadata": {},
  "outputs": [],
  "source": [
    "display(f'θ_max_p: {θ_max_p*rad_to_deg} deg')\n",
    "display(f'max_p: {3*max_p*1e-6} MW)"
  ]
},

```

```

{
  "cell_type": "code",
  "execution_count": null,
  "metadata": {},
  "outputs": [],
  "source": [
    "fig, ax = plt.subplots()\n",
    "\n",
    "ax.plot( $\theta$ *rad_to_deg, 3*p*1e-6, linewidth=1.0)\n",
    "ax.plot( $\theta$ *rad_to_deg, 3*tw*1e-6, linewidth=1.0)\n",
    "ax.plot( $\theta$ *rad_to_deg, 3*tb*1e-6, linewidth=1.0)\n",
    "\n",
    "ax.axvline( $\theta_{\max_p}$ *rad_to_deg, linewidth=0.5, color='k')\n",
    "ax.axhline(3*max_p*1e-6, linewidth=0.5, color='k')\n",
    "\n",
    "ax.set_xlabel(r'Angle of incidence,  $\theta$  (deg))\n",
    "ax.set_ylabel(r'Power,  $p$  (MW))\n",
    "ax.grid()"
  ]
},
{
  "cell_type": "markdown",
  "metadata": {},
  "source": [
    "### Produce a surface plot similar to the paper\n",
    " $\lambda = 8$ ,  $v = 5..20$ ,  $\theta = 5..90$ "
  ]
},
{
  "cell_type": "code",
  "execution_count": null,
  "metadata": {},
  "outputs": [],
  "source": [
    "N = 100\n",
    "\n",
    " $\lambda = 8$ \n",
    "idx_v = np.linspace(5, 20, N)\n",
    "idx_theta = np.linspace(5, 90, N)*deg_to_rad\n",
    "\n",
    "grid_v, grid_theta = np.meshgrid(idx_v, idx_theta)\n",
    "grid_omega = grid_v*lambda/L"
  ]
},
{
  "cell_type": "code",
  "execution_count": null,
  "metadata": {},
  "outputs": [],

```

```

"source": [
  "lambda8 = power_vec(grid_v, grid_Ω, c_fn, theta_fn, r0, rL, grid_θ)"
]
},
{
  "cell_type": "code",
  "execution_count": null,
  "metadata": {},
  "outputs": [],
  "source": [
    "fig, ax = plt.subplots(subplot_kw={'projection': '3d'})\n",
    "surf = ax.plot_surface(grid_v, grid_θ*rad_to_deg, 3*lambda8*1e-6,\n",
    "                        linewidth=0, antialiased=True)\n",
    "\n",
    "ax.view_init(15, 220)\n",
    "\n",
    "ax.set_xlabel(r'Wind speed, $v$ (m/s))\n",
    "ax.set_ylabel(r'Angle of incidence, $\theta$ (deg))\n",
    "ax.set_zlabel(r'Power, $p$ (MW))\n",
    "ax.grid()"
  ]
}
],
"metadata": {
  "kernelspec": {
    "display_name": "Python 3",
    "language": "python",
    "name": "python3"
  },
  "language_info": {
    "codemirror_mode": {
      "name": "ipython",
      "version": 3
    },
    "file_extension": ".py",
    "mimetype": "text/x-python",
    "name": "python",
    "nbconvert_exporter": "python",
    "pygments_lexer": "ipython3",
    "version": "3.8.7"
  }
},
"nbformat": 4,
"nbformat_minor": 4
}

```





In[ ]:= Canvas [ □ ]

In[ ]:= Radial action estimation of windward and leeward torques for wind turbines;  
Tw and Tb and potential power output (P) in Watts

In[ ]:=  
vV = 20; (\* Wind velocity m/sec \*)  
dD = 1.225 (\* Air density kg/m^3 \*)  
θ = 50Degree (\* Wind angle of incidence \*)  
cC = 5 (\* Chord width m \*)  
lL = 80 (\* Blade length m \*)  
λ = 10 (\* Tip speed ratio RΩ/vV \*)  
Ω = λ \* vV / lL (\* Rotor angular velocity rad/sec \*)  
Nu = 3 (\* Number rotors \*)  
Tw = dD cC Sin[θ] Sin[2 θ] vV^2 lL^2 / 2 (\* Windward torque \*)  
Tb = dD cC Cos[θ] Ω lL^3 / 3 (\* Leeward or Back torque \*)  
Pt = (Tw - Tb) Ω Nu

Out[ ]:= 1.225

Out[ ]:= 50 °

Out[ ]:= 5

Out[ ]:= 80

Out[ ]:= 10

Out[ ]:=  $\frac{5}{2}$

Out[ ]:= 3

Out[ ]:=  $5.91455 \times 10^6$

Out[ ]:=  $1.67982 \times 10^6$

Out[ ]:=  $3.17605 \times 10^7$

In[ ]:=

$\ln[^\ast] :=$

$\ln[^\ast] :=$
