# Supplementary material for: A New Way to Estimate Maximum Power from Wind Turbines: Linking Newtonian with Action Mechanics
Source: Copernicus journal article supplement (doi:10.5194/wes-2022-22), 2022-05-04
Supplement: Supplementary file [file wes-2022-22-AC2-supplement.pdf]

```

#####
# Radial Action example code for three-bladed turbine # Tested on Python 3.8.7 # with the following
library versions: # matplotlib==3.4.3 # numpy==1.21.2 # scipy==1.7.1 # To run, pass the script
name to python like this: # python radial_action_example.py
#####
import matplotlib import matplotlib.pyplot as plt from matplotlib import cm import numpy as np
import scipy.integrate import scipy.optimize
#####
# Constants
#####
deg_to_rad = 2.0 * np.pi / 360.0 rad_to_deg = 360.0 / (2 * np.pi) radsec_to_revmin = 60 / (2 * np.pi)
rho = 1.225
#####
# Integrals
#####
def tw_integrand(r, v, c, theta): return (rho * c * np.sin(theta) * np.sin(2*theta) * np.power(v, 2) * r)
def tb_integrand(r, omega, c, theta): return (np.power(rho, 2/3) * c * np.cos(theta) * np.power(r, 2) *
omega)
#####
# Torque functions
#####
def torque_windward(v, c_fn, theta_fn, R0, RL, theta0): integrand = lambda r: tw_integrand(r, v,
c_fn(r), theta_fn(theta0, r)) res, _ = scipy.integrate.quad(integrand, R0, RL) return res
def torque_backward(omega, c_fn, theta_fn, R0, RL, theta0): integrand = lambda r: tb_integrand(r,
omega, c_fn(r), theta_fn(theta0, r)) res, _ = scipy.integrate.quad(integrand, R0, RL) return res
#####
# Power and Optimisation
#####
def power(v, omega, c_fn, theta_fn, R0, RL, theta0): tw = torque_windward(v, c_fn, theta_fn, R0,
RL, theta0) tb = torque_backward(omega, c_fn, theta_fn, R0, RL, theta0) return (tw - tb) * omega
def maximise_power(v, omega, c_fn, theta_fn, R0, RL): """ Maximises power output over theta0.
Returns the maximum power output of the blade and the theta0 that produces it """ # scipy
implements only minimisation # the max of a function's values occurs at the min of the negative of
the function's values minimisation_objective = lambda theta0: -power(v, omega, c_fn, theta_fn, R0,
RL, theta0) res = scipy.optimize.minimize_scalar(minimisation_objective) max_power = -res.fun #
negate the minimum to recover the maximum value max_theta = res.x return max_power,
max_theta
#####
# Rectangular blade definition, example turbine configuration
#####
# blade r0 = 0.00 rL = 38.75 c_fn = lambda r: 1.0 theta_fn = lambda theta0, r: theta0 # turbine L =
rL lambda = 8.0 v = 15.0 Omega = v*lambda/L print(f'Omega = {Omega} rad/s') print(f'Omega = {Omega*radsec_to_revmin} rev/min')
#####
# create vectorised forms
#####
power_vec = np.vectorize(power) torque_windward_vec = np.vectorize(torque_windward)
torque_backward_vec = np.vectorize(torque_backward)
#####
# Example line plot: power, windward and backward torque
#####
# produce an array of input values for the plots # vary theta0 over [5, 90] degrees, 100 evenly
spaced points N = 100 theta = np.linspace(5, 90, N) * deg_to_rad # using an array in the theta0
argument, so that the function produces an array result p = power_vec(v, Omega, c_fn, theta_fn, r0, rL,
theta0=theta) tw = torque_windward_vec(v, c_fn, theta_fn, r0, rL, theta0=theta) tb =
torque_backward_vec(Omega, c_fn, theta_fn, r0, rL, theta0=theta) # max power, theta0 for the given
configuration max_p, theta_max_p = maximise_power(v, Omega, c_fn, theta_fn, r0, rL) print(f'theta_max_p:
{theta_max_p*rad_to_deg} deg') print(f'max_p: {3*max_p*1e-6} MW') # plot the power and torques fig,
ax = plt.subplots() ax.plot(theta*rad_to_deg, 3*p*1e-6, linewidth=1.0) ax.plot(theta*rad_to_deg, 3*tw*1e-6,

```

```

linewidth=1.0) ax.plot( $\theta$ *rad_to_deg, 3* $t_b$ *1e-6, linewidth=1.0) ax.axvline( $\theta_{max\_p}$ *rad_to_deg,
linewidth=0.5, color='k') ax.axhline(3* $max\_p$ *1e-6, linewidth=0.5, color='k') ax.set_xlabel(r'Angle of
incidence,  $\theta$  (deg)') ax.set_ylabel(r'Power,  $P$  (MW)') ax.grid() plt.show()
#####
# Example surface plot: power as a function of velocity and angle of incidence
#####
N = 100  $\lambda$  = 8 idx_v = np.linspace(5, 20, N) idx_theta = np.linspace(5, 90, N)*deg_to_rad grid_v, grid_theta
= np.meshgrid(idx_v, idx_theta) grid_omega = grid_v* $\lambda/L$  lambda8 = power_vec(grid_v, grid_omega, c_fn,
theta_fn, r0, rL, grid_theta) fig, ax = plt.subplots(subplot_kw={"projection": "3d"}) surf =
ax.plot_surface(grid_v, grid_theta*rad_to_deg, 3*lambda8*1e-6, cmap=cm.coolwarm, alpha=0.8,
linewidth=0, antialiased=True) ax.view_init(15, 220) ax.set_xlabel(r'Wind speed,  $v$  (m/s)')
ax.set_ylabel(r'Angle of incidence,  $\theta$  (deg)') ax.set_zlabel(r'Power,  $P$  (MW)') ax.grid()
plt.show()

```
